# Supplementary material for: Simple Enzyme Immobilization for Flow Chemistry? An Assessment of Available Strategies for an Acetaldehyde-Dependent Aldolase
Source: MDPI journal article supplement (doi:10.3390/molecules27196483), 2022-10-01
Supplement: s1 [file s1]

# Simple Enzyme Immobilization for Flow Chemistry? An Assessment of Available Strategies for an Acetaldehyde-Dependent Aldolase

Martin Wäscher <sup>1</sup>, Thomas Classen <sup>2</sup> and Jörg Pietruszka <sup>1,2,\*</sup>

<sup>1</sup> Institute for Bioorganic Chemistry; Heinrich Heine University Düsseldorf, 40225 Düsseldorf, Germany

<sup>2</sup> Institute for Bio- and Geosciences 1: Bioorganic Chemistry, Forschungszentrum Jülich, 52425 Jülich, Germany

\* Correspondence: j.pietruszka@fz-juelich.de; Tel.: +49-(0)2461-61-4158

## SDS-PAGE

SDS-PAGE samples have been prepared by diluting *ad* 60 µL deionized water according to empirical equation

$$V_{\text{sample}} = \frac{375 \mu\text{L}}{OD_{600}} \quad (1)$$

for cell containing samples, or equation

$$V_{\text{sample}} = \frac{72 \text{ mg mL}^{-1}}{\text{protein amount in } [\text{mg mL}^{-1}]} \quad (2)$$

for protein solutions. 15 µL 5x SDS-PAGE sample buffer (10 % w/v SDS, 40 % v/v glycerol, 0.5 % w/v bromophenol blue, 500 mM dithiothreitol in 500 mM Tris/HCl buffer, pH 6.5) were added and the mixture was vortexed. Before application on gel, the samples were heated for 10 min at 95 °C.

0.75 mm gels were prepared with 4 % collection phase and 10 % separation phase. Electrophoresis was carried out at 190 V, 3 Amax for 40 min driven by a *PowerPac HC* (BioRad) according to Schägger *et al.* [1]. Staining was conducted as described by Kang *et al* [2]. The result was documented with an *EOS 1000D* (Canon).

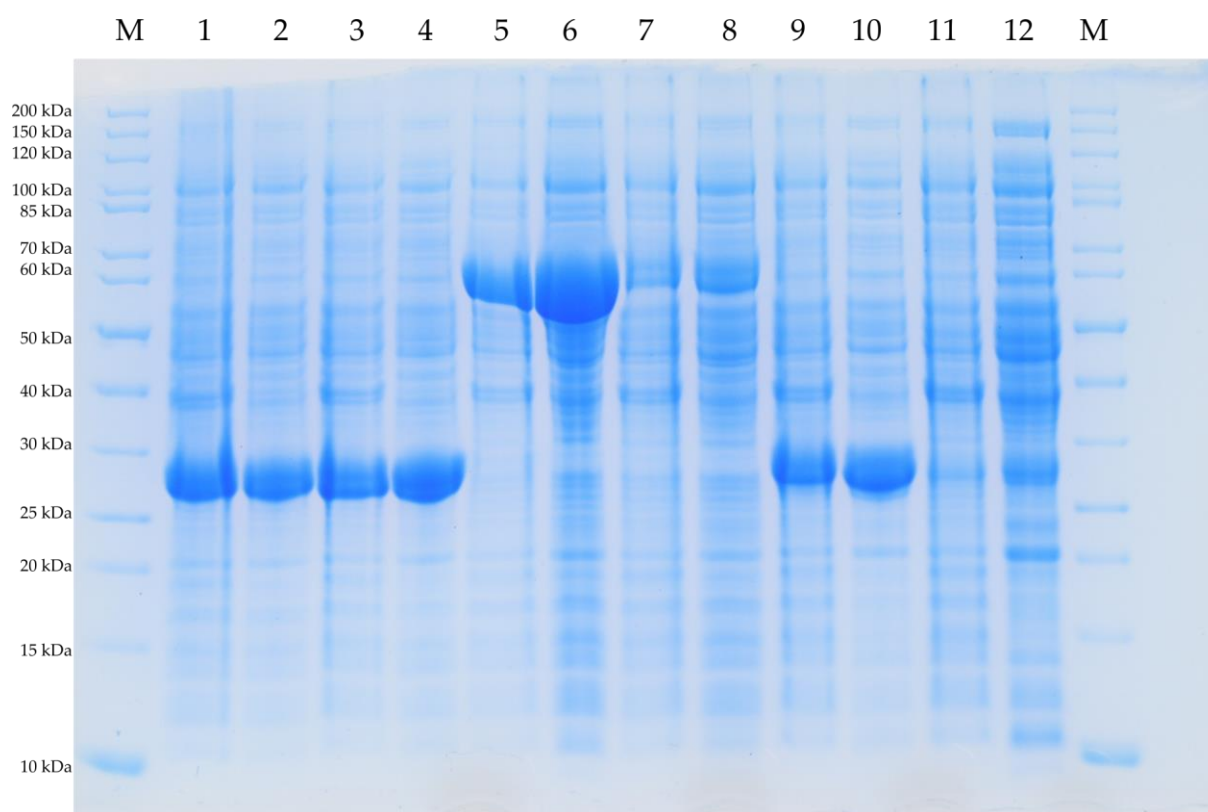

**Supplementary Figure S1.** SDS-PAGE for protein expression control. **M:** 5  $\mu$ L Protein Marker: PageRuler™ unstained protein ladder (ThermoScientific) contains Proteins of size: 200 kDa, 150 kDa, 120 kDa, 100 kDa, 85 kDa, 70 kDa; 60 kDa, 50 kDa, 40 kDa, 30 kDa, 25 kDa, 20 kDa, 15 kDa, 10 kDa. **1:** 15  $\mu$ L sample from deoC-EC-DM-CHis expression (pellet resuspension), calculated molecular weight (MW<sub>c</sub>): 28.9 kDa. **2:** 15  $\mu$ L sample from DeoC-EC-DM-CHis preparation (clear cell-free extract), MW<sub>c</sub>: 28.9 kDa. **3:** 15  $\mu$ L sample from deoC-EC-DM-NHis expression (pellet resuspension), MW<sub>c</sub>: 28.9 kDa. **4:** 15  $\mu$ L sample from DeoC-EC-DM-NHis preparation (clear cell-free extract), MW<sub>c</sub>: 28.9 kDa. **5:** 15  $\mu$ L sample from deoC-EC-DM-CHalo expression (pellet resuspension), MW<sub>c</sub>: 63.6 kDa **6:** 15  $\mu$ L sample from DeoC-EC-DM-CHalo preparation (clear cell-free extract), MW<sub>c</sub>: 63.6 kDa. **7:** 15  $\mu$ L sample from deoC-EC-DM-NHalo expression (pellet resuspension), MW<sub>c</sub>: 63.8 kDa. **8:** 15  $\mu$ L sample from DeoC-EC-DM-NHalo preparation (clear cell-free extract), MW<sub>c</sub>: 63.8 kDa. **9:** 15  $\mu$ L sample from deoC-EC-DM-CHisNu expression (pellet resuspension), MW<sub>c</sub>: 29.2 kDa. **10:** 15  $\mu$ L sample from DeoC-EC-DM-NNuHis preparation (clear cell-free extract), MW<sub>c</sub>: 29.2 kDa. **11:** 15  $\mu$ L sample from deoC-EC-DM-NNuHis expression (pellet resuspension), MW<sub>c</sub>: 29.2 kDa. **12:** 15  $\mu$ L sample from DeoC-EC-DM-NNuHis preparation (clear cell-free extract), MW<sub>c</sub>: 29.2 kDa.

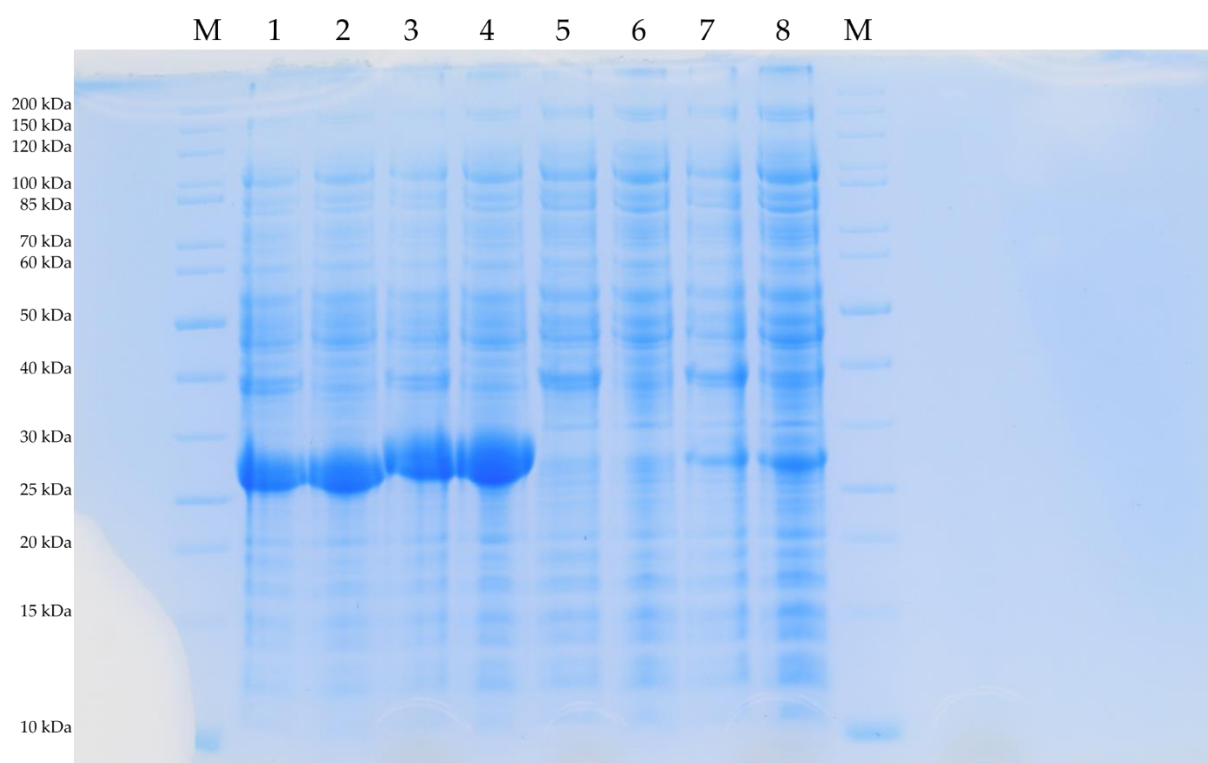

**Supplementary Figure S2.** SDS-PAGE for protein expression control. **M:** 5  $\mu$ L Protein Marker: PageRuler™ unstained protein ladder (ThermoScientific) contains Proteins of size: 200 kDa, 150 kDa, 120 kDa, 100 kDa, 85 kDa, 70 kDa; 60 kDa, 50 kDa, 40 kDa, 30 kDa, 25 kDa, 20 kDa, 15 kDa, 10 kDa. **1:** 15  $\mu$ L sample from deoC-EC-DM-CNu expression (pellet resuspension), calculated molecular weight ( $MW_c$ ): 28.4 kDa. **2:** 15  $\mu$ L sample from DeoC-EC-DM-CNu preparation (clear cell-free extract),  $MW_c$ : 28.4 kDa. **3:** 15  $\mu$ L sample from deoC-EC-DM-CStrep expression (pellet resuspension),  $MW_c$ : 29.3 kDa. **4:** 15  $\mu$ L sample from DeoC-EC-DM-CStrep preparation (clear cell-free extract),  $MW_c$ : 29.3 kDa. **5:** 15  $\mu$ L sample from deoC-EC-DM-NNu expression (pellet resuspension),  $MW_c$ : 28.4 kDa **6:** 15  $\mu$ L sample from DeoC-EC-DM-NNu preparation (clear cell-free extract),  $MW_c$ : 28.4 kDa. **7:** 15  $\mu$ L sample from deoC-EC-DM-NStrep expression (pellet resuspension),  $MW_c$ : 29.3 kDa. **8:** 15  $\mu$ L sample from DeoC-EC-DM-NStrep preparation (clear cell-free extract),  $MW_c$ : 29.3 kDa.

## Reactor stability - full data

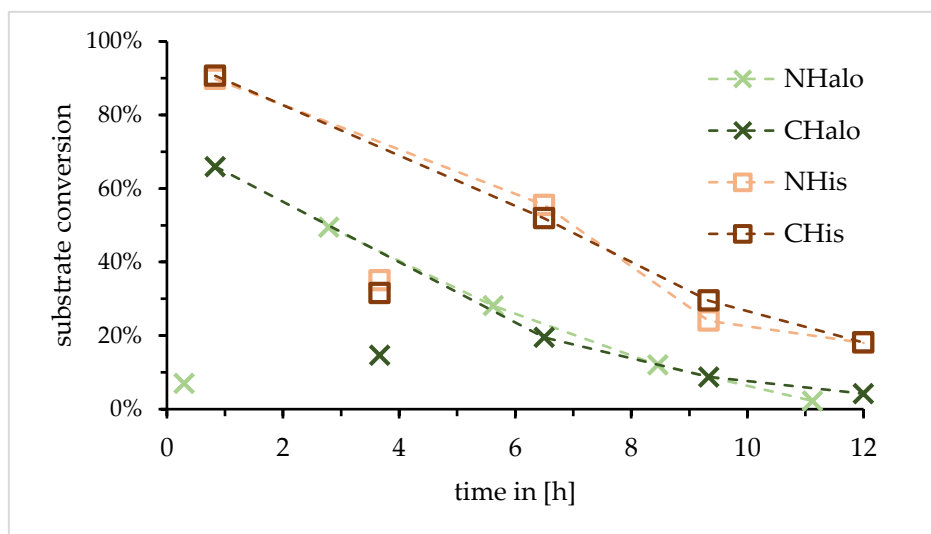

**Supplementary Figure S3.** Change in substrate conversion over time by continuous usage for the reaction of hexanal (1) and acetaldehyde (2) towards 3-hydroxyoctanal (3) catalyzed by the DERA reactors. (hexanal (1) as observed substrate). Light-green cross: reactor with N-terminal HaloTag®-DERA (NHalo). Dark-green cross: reactor with C-terminal HaloTag®-DERA (CHalo). Light brown square: reactor with N-terminal HisTag-DERA (NHis). Dark-brown square: reactor with C-terminal HisTag-DERA (CHis).

## Fit parameters

**Supplementary Table S1.** DERA-CHalo-Link: DeoC<sub>EC</sub>-C47M-A95C with C-terminal HaloTag® immobilized on HaloLink®-resin. CStrep-Tactin: DeoC<sub>EC</sub>-C47M-A95C with C-terminal StrepTag immobilized on StrepTactin™-Sephacrose®. CHis-Ni-S6FF: DeoC<sub>EC</sub>-C47M-A95C with C-terminal HisTag immobilized on IMAC Sepharose® 6 FastFlow tethered by Nickel ions. CHisNu-Ni-S6FF: DeoC<sub>EC</sub>-C47M-A95C with C-terminal HisTag with additional cysteins immobilized on IMAC Sepharose® 6 FastFlow tethered by nickel ions. CHis-Immobead: DeoC<sub>EC</sub>-C47M-A95C with C-terminal HisTag immobilized on Immobead150P. Reactor size: ~350 µL.

|                                    | Fit-parameters                                         |                                         |                                         | Fit-Quality |               |
|------------------------------------|--------------------------------------------------------|-----------------------------------------|-----------------------------------------|-------------|---------------|
|                                    | limit $t \rightarrow \infty$<br>$y_0$<br>[µmol/10 min] | initial $t=0$<br>$A_1$<br>[µmol/10 min] | decay rate factor<br>$t_1$<br>[x10 min] | $R^2$       | corr. $R^2$ ‡ |
| DERA-CHalo-Link                    | $5.6 \pm 0.6$                                          | $62.4 \pm 7.6$                          | $30.9 \pm 3.4$                          | 0.97        | 0.97          |
| DERA-CStrep-Tactin                 | $0.0 \pm 0.1$                                          | $96.1 \pm 14.9$                         | $9.6 \pm 0.7$                           | 0.99        | 0.99          |
| DERA-CHis-Ni <sup>2+</sup> -S6FF   | $15.7 \pm 28.5$                                        | $33.1 \pm 25.8$                         | $230.9 \pm 308.3$                       | 0.85        | 0.83          |
| DERA-CHisNu-Ni <sup>2+</sup> -S6FF | $0 \pm 174$                                            | $35.4 \pm 172.5$                        | $776.9 \pm 4392$                        | 0.81        | 0.78          |
| DERA-CHis-Immobead                 | $0.9 \pm 0.2$                                          | $6.1 \pm 0.8$                           | $61.6 \pm 10.4$                         | 0.99        | 0.98          |

‡: corrected  $R^2$  considers degrees of freedom of fit. Please refer to *OriginLab*-manual for detailed calculation [3].

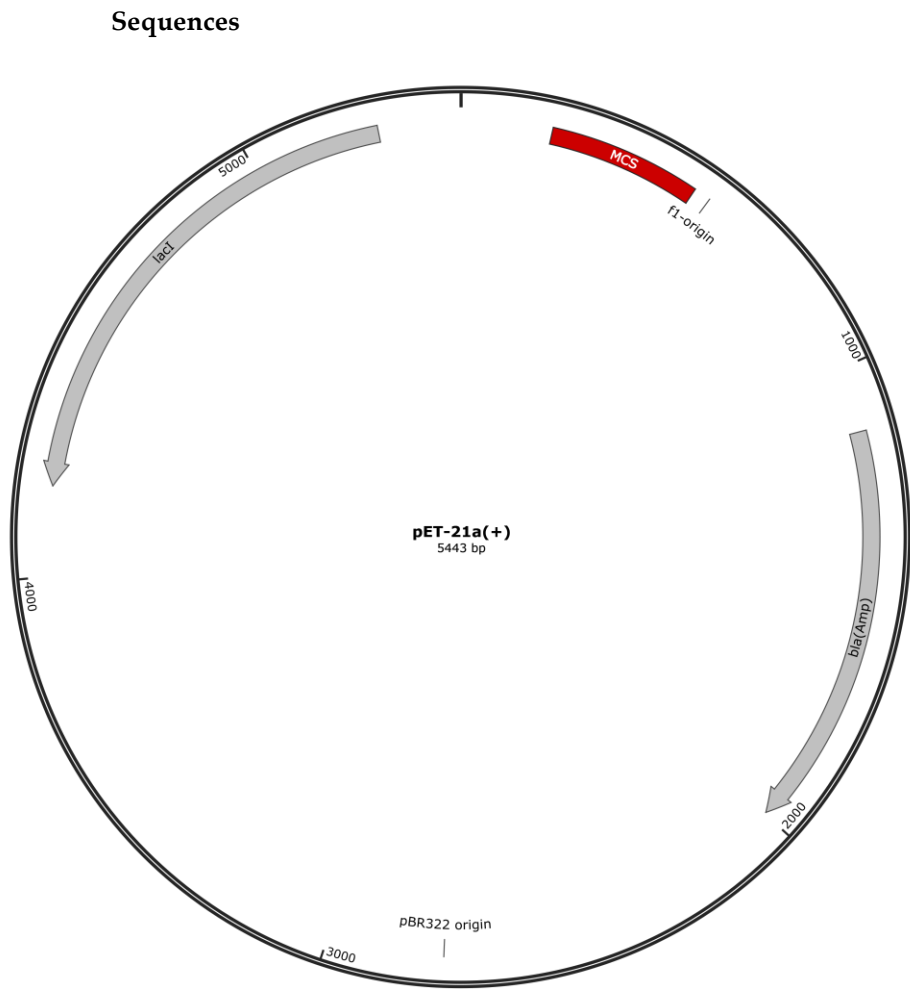

Supplementary Figure S4. Plasmid map of pET-21a(+)

*pET21a(+)-MCS*

| GATC | Plasmid features |            |               |            |              |            |            |            |
|------|------------------|------------|---------------|------------|--------------|------------|------------|------------|
| 1    | AGATCTCGAT       | CCCGCGAAAT | TAATACGACT    | CACTATAGGG | GAATTGTGAG   | CGGATAACAA | TTCCCCTCTA | GAAATAATTT |
|      |                  |            | T7-Promoter   |            | lac-Operator |            |            |            |
| 81   | TGTTTAACTT       | TAAGAAGGAG | ATATACATAT    | GGCTAGCATG | ACTGGTGGAC   | AGCAAATGGG | TCGCGGATCC | GAATTCGAGC |
|      |                  |            | T7-Tag        |            |              |            |            |            |
| 161  | TCCGTCGACA       | AGCTTGCGGC | CGCACTCGAG    | CACCACCACC | ACCACCACTG   | AGATCCGGCT | GCTAACAAAG | CCCGAAAGGA |
|      |                  |            | His-Tag       |            |              |            |            |            |
| 241  | AGCTGAGTTG       | GCTGCTGCCA | CCGCTGAGCA    | ATAACTAGCA | TAACCCCTTG   | GGGCCTCTAA | ACGGGTCTTG | AGGGGTTTTT |
|      |                  |            | T7-terminator |            |              |            |            |            |
| 321  | TG               |            |               |            |              |            |            |            |

DeoC reference sequence  
UniProt accession number: P0A6L0 [4]

*pET21a-deoC-EC-DM-NHis\_MCS-frame*

|      |                                                                                         |
|------|-----------------------------------------------------------------------------------------|
| GATC | Plasmid features                                                                        |
| GATC | deoC-gene                                                                               |
| GATC | gene modifications                                                                      |
| GATC | HisTag                                                                                  |
| 1    | AGATCTCGAT CCCGCGAAAT TAATACGACT CACTATAGGG GAATTGTGAG CGGATAACAA TTCCTCTCTA GAAATAATTT |
|      | T7-Promoter lac-Operator                                                                |
| 81   | TGTTTAACTT TAAGAAGGAG ATATACATAT GCATCACCAT CACCACCATG CTAGCACTGA TCTGAAAGCA AGCAGCCTGC |
|      | HisTag N-flank                                                                          |
| 161  | GTGCACTGAA ATTGATGGAC CTGACCACCC TGAATGACGA CGACACCGAC GAGAAAGTGA TCGCCCTGTG TCATCAGGCC |
| 241  | AAAACCTCCG TCAGCAATAC CGCGCTATC ATGATCTATC CTCGCTTTAT CCCGATTGCT CGCAAACTC TGAAAGAGCA   |
|      | C47M                                                                                    |
| 321  | GGGCACCCCG GAAATCCGTA TCGCTACGGT AACCAACTTC CCACACGGTA ACGACGACAT CGACATCGCG CTGGCAGAAA |
| 401  | CCCGTGCGGC AATCTGCTAC GGTGCTGATG AAGTTGACGT TGTGTTCCCG TACCGCGCGC TGATGGCGGG TAACGAGCAG |
|      | A95C                                                                                    |
| 481  | GTTGGTTTTG ACCTGGTGAA AGCCTGTAAA GAGGCTTGCG CGGCAGCGAA TGTACTGCTG AAAGTGATCA TCGAAACCGG |
| 561  | CGAACTGAAA GACGAAGCGC TGATCCGTAA AGCGTCTGAA ATCTCCATCA AAGCGGGTGC GGAATTCATC AAAACCTCTA |
| 641  | CCGGTAAAGT GGCTGTGAAC GCGACGCCCG AAAGCGCGCG CATCATGATG GAAGTGATCC GTGATATGGG CGTAGAAAAA |
| 721  | ACCGTTGGTT TCAAACCGGC GGGCGGCGTG CGTACTGCGG AAGATGCGCA GAAATATCTC GCCATTGCAG ATGAACTGTT |
| 801  | CGGTGCTGAC TGGGCAGATG CGCGTCACTA CCGCTTTGGC GCTTCCAGCC TGCTGGCAAG CCTGCTGAAA GCGCTGGGTC |
| 881  | ACGGCGACGG TAAGAGCGCC AGCAGCTACG GATCCTGACT CGAGCACCAC CACCACCACC ACTGAGATCC GGCTGCTAAC |
|      | C-flank His-Tag                                                                         |
| 961  | AAAGCCCGAA AGGAAGCTGA GTTGGCTGCT GCCACCGCTG AGCAATAACT AGCATAACCC CTTGGGGCCT CTAAACGGGT |
|      | T7-Terminator                                                                           |
| 1041 | CTTGAGGGGT TTTTGT                                                                       |

DeoC-EC-DM-NHis AA-sequence

“NHis”

|     |            |            |            |            |            |            |            |            |
|-----|------------|------------|------------|------------|------------|------------|------------|------------|
| 1   | MHHHHHAST  | DLKASSLRAL | KLMDLTTLND | DDTDEKVIAL | CHQAKTPVGN | TAAIMIYPRF | IPIARKTLKE | QGTPEIRIAT |
| 81  | VTNFPHGND  | IDIALAETRA | AICYGADEV  | VVFPYRALMA | GNQVGFDLV  | KACKEACAAA | NVLLKVIIET | GELKDEALIR |
| 161 | KASEISIKAG | ADFIKTSTGK | VAVNATPESA | RIMMEVIRDM | GVEKTVGFKP | AGGVRTAEDA | QKYLAIADL  | FGADWADARH |
| 241 | YRFGASSLLA | SLLKALGHGD | GKSASSYGS  |            |            |            |            |            |

*pET21a-deoC-EC-DM-NHalo\_MCS-frame*

GATC Plasmid features  
 GATC deoC-gene  
 GATC gene modifications  
 GATC linker-sequence  
 GATC HaloTag

```

1 AGATCTCGAT CCCGCGAAAT TAATACGACT CACTATAGGG GAATTGTGAG CGGATAACAA TTCCCTCTTA GAAATAATTT
                                T7-Promoter lac-Operator
81 TGTTTAACTT TAAGAAGGAG ATATACATAT GGCAGAAATT GGTACGGGAT TTCCGTTTGA CCCGCATTAT GTGGAGGTTT
161 TGGGTGAACG CATGCACTAC GTGGATGTTG GTCCGCGCGA TGGCACACCG GTGCTGTTTC TGCATGGTAA TCCGACCTCC
241 AGCTATGTTT GGCGCAACAT TATTCGCGAT GTCGCCCCAA CGCATCGCTG TATTGCCCA GATCTCATTG GCATGGGCAA
321 AAGCGACAAA CCGGATTTGG GCTACTTCTT CGACGATCAC GTACGGTTTA TGGACGCCTT TATCGAGGCT CTGGGACTGG
                                C-->G (silent)
401 AGGAAGTAGT GCTGGTTATT CATGACTGGG GCTCTGCATT AGGCTTTCAC TGGGCTAAAC GGAACCCAGA ACGCGTCAAG
481 GGGATTGCCT TCATGGAGTT CATCCGTCCG ATTCGGACCT GGGATGAATG GCCCGAATTT GCCCGTGAAA CCTTTCAGGC
561 GTTTCGTACC ACGGATGTTG GCCGTAAGCT CATCATCGAC CAAAACGTGT TCATTGAGGG CACTCTTCCC ATGGGAGTAG
641 TGCGTCCTTT AACCGAAGTC GAGATGGACC ACTATCGCGA ACCCTTCCTG AATCCGGTTG ATCGCGAACC GCTGTGGCGC
721 TTCCCGAATG AGCTGCCTAT TGCTGGTGAA CCGCGCAATA TCGTGCCACT TGTGGAAGAA TACATGGATT GGCTGCATCA
801 GAGTCCAGTC CCTAAGCTGT TGTTTTGGGG TACACCTGGC GTGTTGATTC CGCCTGCAGA AGCTGCTCGC TTAGCGAAAA
881 GCTTGCCCAA CTGCAAAGCG GTCGATATTG GGCAGGTCT GAACCTGTTA CAGGAGGATA ACCCGGATCT GATCGGGAGT
961 GAAATCGCGC GTTGGCTGTC AACTCTGGAA ATCTCGGGTC TTGCAGAAGC AGCGGCCAAA GAAGCTGCGG CCAAAGAGGC
                                4xEAAK-linker
1041 AGCCGCGAAA GAAGCAGCGG CGAAATGGC TAGCACTGAT CTGAAAGCAA GCAGCCTGCG TGCCTGAAA TTGATGGACC
                                N-flank
1121 TGACCAACCT GAATGACGAC GACACCGACG AGAAAAGTAT CGCCCTGTGT CATCAGGCCA AAACCTCCGT CCGCAATACC
1201 GCCGCTATCA TGATCTATCC TCGCTTTATC CCGATTGCTC GCAAACTCT GAAAGAGCAG GGCACCCCGG AAATCCGTAT
                                C47M
1281 CGCTACGGTA ACCAACTTCC CACACGGTAA CGACGACATC GACATCGCGC TGGCAGAAAC CCGTGC GGCA ATCTGTCTACG
                                A95C
1361 GTGCTGATGA AGTTGACGTT GTGTTCCCGT ACCGCGCGCT GATGGCGGGT AACGAGCAGG TTGGTTTGA CCTGGTGAAA
1441 GCCTGTAAAG AGGCTTGCGC GGCAGCGAAT GTACTGTGTA AAGTGATCAT CGAAACCGGC GAAGTAAAG ACGAAGCGCT
1521 GATCCGTAAA GCGTCTGAAA TCTCCATCAA AGCGGGTGCG GACTTCATCA AAACCTCTAC CGGTAAAGTG GCTGTGAACG
1601 CGACGCCGGA AAGCGCGCGC ATCATGATGG AAGTGATCCG TGATATGGGC GTAGAAAAAA CCGTTGTTT CAAACCGCGC
1681 GGCGGCGTGC GTACTGCGGA AGATGCGCAG AAATATCTCG CCATTGCAGA TGAAGTGTTC GGTGCTGACT GGGCAGATGC
1761 GCGTCACTAC CGCTTTGGCG CTTCCAGCCT GCTGGCAAGC CTGCTGAAAG CGCTGGGTCA CGGCGACGGT AAGAGCGCCA
1841 GCAGCTACGG ATCCTGACTC GAGCACCACC ACCACCACCA CTGAGATCCG GCTGCTAACA AAGCCCGAAA GGAAGCTGAG
                                C-flank His-Tag
1921 TTGGCTGCTG CCACCGCTGA GCAATAACTA GCATAACCCC TTGGGGCCTC TAAACGGGTC TTGAGGGGTT TTTTG
                                T7-Terminator
  
```

*DeoC-EC-DM-NHalo AA-sequence**"NHalo"*

```

1 MAEIGTGFPF DPHYVEVLGE RMHYVDVGPR DGPVLFHLG NPTSSYVWRN IIPHVAPTHR CIAPDLIGMG KSDKPDLGYF
81 FDDHVRFMDA FIEALGLEEV VLVIHDWGS LGFWHAKRNP ERVKGIAFME FIRPIPTWDE WPEFARETFO AFRTTDVGRK
161 LIIDQNVFIE GTLPMGVVRP LTEVEMDHYR EPFLNPVDRE PLWRFPNELP IAGEPANIVA LVEEYMDWLH QSPVPKLLFW
241 GTPGVLIPPA EAARLAKSLP NCKAVDIGPG LNLQEDNPD LIGSEIARWL STLEISGLAE AAAKEAAAAKE AAAKEAAAKM
321 ASTDLKASSL RALKLMDLTT LNDDDTDEKV IALCHQAKTP VGNTAAIMY PRFIPIARKT LKEQGTPEIR IATVTNFPHG
401 NDDIDIALAE TRAAICYGAD EVDVFPYRA LMAGNEQVGF DLVKACKEAC AAANVLLKVI IETGELKDEA LIRKASEISI
481 KAGADFIKTS TGKVAVNATP ESARIMMEVI RDMGVEKTVG FKPAGGVRTA EDAQKYLAIA DELFGADWAD ARHYRFGASS
561 LLASLLKALG HGDGKSASSY GS
  
```

pET21a-deoC-EC-DM-CHis\_MCS-frame

|      |                                                                                          |
|------|------------------------------------------------------------------------------------------|
| GATC | Plasmid features                                                                         |
| GATC | deoC-gene                                                                                |
| GATC | gene modifications                                                                       |
| GATC | HisTag                                                                                   |
| 1    | AGATCTCGAT CCCGCGAAAT TAATACGACT CACTATAGGG GAATTGTGAG CGGATAACAA TTCCTCTCTA GAAATAATTT  |
|      | T7-Promoter lac-Operator                                                                 |
| 81   | TGTTTAACTT TAAGAAGGAG ATATACATAT GGCTAGCACT GATCTGAAAG CAAGCAGCCT GCGTGCCTG AAATTGATGG   |
|      | N-flank                                                                                  |
| 161  | ACCTGACCAC CCTGAATGAC GACGACACCG ACGAGAAAGT GATCGCCCTG TGTCATCAGG CAAAACCTCC GGTCGGCAAT  |
| 241  | ACCGCCGCTA TCATGATCTA TCCTCGCTTT ATCCCGATTG CTCGCAAAAC TCTGAAAGAG CAGGGCACCC CGGAAATCCG  |
|      | C47M                                                                                     |
| 321  | TATCGCTACG GTAACCAACT TCCCACACGG TAACGACGAC ATCGACATCG CGCTGGCAGA AACCCGTGCG GCAATCTGCT  |
|      | A95C                                                                                     |
| 401  | ACGGTGCTGA TGAAGTTGAC GTTGTGTTCC CGTACCGCGC GCTGATGGCG GGTAACGAGC AGGTTGGTTT TGACCTGGTG  |
| 481  | AAAGCCTGTA AAGAGGCTTG CGCGGCAGCG AATGTACTGC TGAAAGTGAT CATCGAAACC GGCGAAGTGA AAGACGAAGC  |
| 561  | GCTGATCCGT AAAGCGTCTG AAATCTCCAT CAAAGCGGGT GCGGACTTCA TCAAAACCTC TACCGGTAAA GTGGCTGTGA  |
| 641  | ACGCGACGCC GGAAAGCGCG CGCATCATGA TGGAAAGTGAT CCGTGATATG GGCGTAGAAA AAACCGTTGG TTTCAAACCG |
| 721  | GCGGGCGGCG TGCGTACTGC GGAAGATGCG CAGAAATATC TCGCCATTGC AGATGAACTG TTCGGTGCTG ACTGGGCAGA  |
| 801  | TGCGCGTCAC TACCGCTTTG GCGCTTCCAG CCTGCTGGCA AGCCTGCTGA AAGCGCTGGG TCACGCGCAC GGTAAGAGCG  |
| 881  | CCAGCAGCTA CGGATCCCAT CACCATCACC ACCATTGACT CGAGACCAC CACCACCACC ACTGAGATCC GGCTGCTAAC   |
|      | C-flank HisTag His-Tag                                                                   |
| 961  | AAAGCCCGAA AGGAAGCTGA GTTGCTGCT GCCACCGCTG AGCAATAACT AGCATAACCC CTGGGGCCT CTAAACGGGT    |
|      | T7-Terminator                                                                            |
| 1041 | CTTGAGGGGT TTTTGT                                                                        |

DeoC-EC-DM-CHis AA-sequence

“CHis”

|     |                                                                                          |
|-----|------------------------------------------------------------------------------------------|
| 1   | MASTDLKASS LRALKLMDLT TLNDDDTDEK VIALCHQAKT PVGNATAIMI YPRFIPIARK TLKEQGTPEI RIATVTNFPH  |
| 81  | GNDDIDIALA ETRAATICYGA DEVDVVFPYR ALMAGNEQVG FDLVKACKEA CAAANVLLKV IIETGELKDE ALIRKASEIS |
| 161 | IKAGADFIKT STGKVAVNAT PESARIMMEV IRDMGVEKTV GFKPAGGVRT AEDAQKYLAI ADELFGADWA DARHYRFGAS  |
| 241 | SLLASLLKAL GHGDGKSASS YGSHHHHHH                                                          |



*pET21a-deoC-EC-DM-CHisNu\_MCS-frame*

GATC Plasmid features  
 GATC deoC-gene  
 GATC gene modifications  
 GATC HisNuTag

```

1 AGATCTCGAT CCCGCGAAAT TAATACGACT CACTATAGGG GAATTGTGAG CGGATAACAA TTCCTCTCTA GAAATAATTT
                                T7-Promoter                lac-Operator
81 TGTTTAACTT TAAGAAGGAG ATATACATAT GGCTAGCACT GATCTGAAAG CAAGCAGCCT GCGTGCACGT AAATTGATGG
                                N-flank
161 ACCTGACCAC CCTGAATGAC GACGACACCG ACGAGAAAGT GATCGCCCTG TGTCAATCAGG CCAAACTCC GGTCCGCAAT
241 ACCGCCGCTA TCATGATCTA TCCTCGCTTT ATCCCGATTG CTCGCAAAAC TCTGAAAGAG CAGGGCACCC CGGAAATCCG
                                C47M
321 TATCGCTACG GTAACCAACT TCCCACACGG TAACGACGAC ATCGACATCG CGCTGGCAGA AACCCGTGCG GCAATCTGCT
                                A95C
401 ACGGTGCTGA TGAAGTTGAC GTTGTGTTCC CGTACCGCGC GCTGATGGCG GGTAACGAGC AGGTTGGTTT TGACCTGGTG
481 AAAGCCTGTA AAGAGGCTTG CGCGGCAGCG AATGTACTGC TGAAAGTGAT CATCGAAACC GGCGAACTGA AAGACGAAGC
561 GCTGATCCGT AAAGCGTCTG AAATCTCCAT CAAAGCGGGT GCGGACTTCA TCAAAACCTC TACCGGTAAA GTGGCTGTGA
641 ACGCGACGCC GGAAAGCGCG CGCATCATGA TGGAAAGTGAT CCGTGATATG GGCGTAGAAA AAACCGTTGG TTTCAAACCG
721 GCGGGCGGCG TGCGTACTGC GGAAGATGCG CAGAAATATC TCGCCATTGC AGATGAACTG TTCGGTGCTG ACTGGGCAGA
801 TGCGCGTCAC TACCGCTTTG GCGCTTCCAG CCTGCTGGCA AGCCTGCTGA AAGCGCTGGG TCACGGCGAC GGTAAGAGCG
881 CCAGCAGCTA CGGATCCCAT CACCATCACC ACCATGGCGG GTGTTGCTGA CTCGAGCACC ACCACCACCA CCACCACCAC
                                C-flank HisNuTag                                His-Tag*
961 TGAGATCCGG CTGCTAACAA AGCCCGAAAG GAAGCTGAGT TGGCTGCTGC CACCGCTGAG CAATAACTAG CATAACCCCT
                                T7-Terminator
1041 TGGGGCCTCT AACCGGGTCT TGAGGGGTTT TTTG
  
```

\* His8 instead of His6 due to misaligned primer. No consequence for gene.

*DeoC-EC-DM-CHisNu AA-sequence**“CHisNu”*

```

1 MASTDLKASS LRALKLMDLT TLNDDDTDEK VIALCHQAKT PVGNATAIMI YPRFIPIARK TLKEQGTPEI RIATVTNFPH
81 GNDDIDIALA ETRAICYGA DEVDVFPYR ALMAGNEQVG FDLVKACKEA CAAANVLLKV IIETGELKDE ALIRKASEIS
161 IKAGADFIKT STGKVAVNAT PESARIMMEV IRDMGVEKTV GFKPAGGVRT AEDAQKYLAI ADELFGADWA DARHYRFGAS
241 SLLASLLKAL GHGDGKSASS YGSHHHHHHG GCC
  
```

*pET21a-deoC-EC-DM-CStrep\_MCS-frame*

GATC Plasmid features  
 GATC deoC-gene  
 GATC gene modifications  
 GATC StrepTag

```

1 AGATCTCGAT CCCGCGAAAT TAATACGACT CACTATAGGG GAATTGTGAG CGGATAACAA TTCCTCTCTA GAAATAATTT
                                T7-Promoter          lac-Operator
81 TGTTTAACTT TAAGAAGGAG ATATACATAT GGCTAGCACT GATCTGAAAG CAAGCAGCCT GCGTGCCTG AAATTGATGG
                                N-flank
161 ACCTGACCAC CCTGAATGAC GACGACACCG ACGAGAAAGT GATCGCCCTG TGTCAATCAGG CCAAACTCC GGTCTGGCAAT
241 ACCGCCGCTA TCATGATCTA TCCTCGCTTT ATCCCGATTG CTCGCAAAAC TCTGAAAGAG CAGGGCACCC CGGAAATCCG
                                C47M
321 TATCGCTACG GTAACCAACT TCCCACACGG TAACGACGAC ATCGACATCG CGCTGGCAGA AACCCGTGCG GCAATCTGCT
                                A95C
401 ACGGTGCTGA TGAAGTTGAC GTTGTGTTCC CGTACCGCGC GCTGATGGCG GGTAACGAGC AGGTTGGTTT TGACCTGGTG
481 AAAGCCTGTA AAGAGGCTTG CGCGGCAGCG AATGTACTGC TGAAAGTGAT CATCGAAACC GGCGAACTGA AAGACGAAGC
561 GCTGATCCGT AAAGCGTCTG AAATCTCCAT CAAAGCGGGT GCGGACTTCA TCAAAACCTC TACCGGTAAA GTGGCTGTGA
641 ACGCGACGCC GGAAAGCGCG CGCATCATGA TGGAAAGTGAT CCGTGATATG GGCGTAGAAA AAACCGTTGG TTTCAAACCG
721 GCGGGCGGCG TGCGTACTGC GGAAGATGCG CAGAAATATC TCGCCATTGC AGATGAACTG TTCGGTGCTG ACTGGGCAGA
801 TGCGCGTCAC TACCGCTTTG GCGCTTCCAG CCTGCTGGCA AGCCTGCTGA AAGCGCTGGG TCACGCGCAC GGTAAGAGCG
881 CCAGCAGCTA CGGATCCTCT GCGTGGTCAC ATCCTCAGTT CGAGAAATGA CTCGAGCACC ACCACCACCA CCACTGAGAT
                                C-flank StrepTag          His-Tag
961 CCGGCTGCTA ACAAAGCCCG AAAGGAAGCT GAGTTGGCTG CTGCCACCGC TGAGCAATAA CTAGCATAAC CCCTTGGGGC
                                T7-Terminator
1041 CTCTAAACGG GTCTTGAGGG GTTTTTTG
  
```

*DeoC-EC-DM-CStrep AA-sequence**"CStrep"*

```

1 MASTDLKASS LRALKLMDLT TLNDDDTDEK VIALCHQAKT PVGNATAIMI YPRFIPIARK TLKEQGTPEI RIATVTNFPH
81 GNDDIDIALA ETRAATICYGA DEVDVVFPYR ALMAGNEQVG FDLVKACKEA CAAANVLLKV IIETGELKDE ALIRKASEIS
161 IKAGADFIKT STGKVAVNAT PESARIMMEV IRDMGVEKTV GFKPAGGVRT AEDAQKYLAI ADELFGADWA DARHYRFGAS
241 SLLASLLKAL GHGDGKSASS YGSAWSHPQFEK
  
```

*pET21a-deoC-EC-DM-CHalo\_MCS-frame*

GATC Plasmid features  
 GATC deoC-gene  
 GATC gene modifications  
 GATC linker-sequence  
 GATC HaloTag

```

1 AGATCTCGAT CCCGCGAAAT TAATACGACT CACTATAGGG GAATTGTGAG CGGATAACAA TTCCCCTCTA GAAATAATTT
   T7-Promoter lac-Operator
81 TGTTTAACTT TAAGAAGGAG ATATACATAT GGCTAGCACT GATCTGAAAG CAAGCAGCCT GCGTGCCTG AAATTGATGG
   N-flank
161 ACCTGACCAC CCTGAATGAC GACGACACCG ACGAGAAAGT GATCGCCCTG TGTCATCAGG CCAAACTCC GGTTCGCAAT
241 ACCGCCGCTA TCATGATCTA TCCTCGCTTT ATCCCGATTG CTCGCAAAAC TCTGAAAGAG CAGGGCACCC CGGAAATCCG
   C47M
321 TATCGCTACG GTAACCAACT TCCACACGCG TAACGACGAC ATCGACATCG CGCTGGCAGA AACCCGTGCG GCAATCTGCT
   A95C
401 ACGGTGCTGA TGAAGTTGAC GTTGTGTTCC CGTACCGCGC GCTGATGGCG GGTAAACGAGC AGGTTGGTTT TGACCTGGTG
481 AAAGCCTGTA AAGAGGCTTG CGCGGCAGCG AATGTACTGC TGAAAGTGAT CATCGAAACC GGCGAACTGA AAGACGAAGC
561 GCTGATCCGT AAAGCGTCTG AAATCTCCAT CAAAGCGGGT GCGGACTTCA TCAAAACCTC TACCGGTAAA GTGGCTGTGA
641 ACGCGACGCC GGAAAGCGCG CGCATCATGA TGAAGTGAT CCGTGATATG GGCGTAGAAA AAACCGTTGG TTTCAAACCG
721 GCGGCGGCGG TCGTACTGCG GGAAGATGCG CAGAAATATC TCGCCATTGC AGATGAAC TGCGGTGCTG ACTGGGCAGA
801 TGCGCGTCAC TACCGCTTTG GCGCTTCCAG CCTGCTGGCA AGCCTGCTGA AAGCGCTGGG TCACGGCGAC GGTAAAGAGC
881 CCAGCAGCTA CGGATCCGAA GCAGCGGCCA AAGAAGCTGC GGCCAAAGAG GCAGCCGCGA AAGAAGCAGC GGCGAAAGCA
   C-flank 4x EAAAK-linker
961 GAAATTGGTA CGGGATTTCC GTTTGACCCG CATTATGTGG AGTTTCTGGG TGAACGCATG CACTACGTGG ATGTTGGTCC
1041 GCGCGATGGC ACACCGGTGC TGTTTCTGCA TGGTAATCCG ACCTCCAGCT ATGTTTGGCG CAACATTATT CCGCATGTGC
1121 CCCCACGCA TCGCTGTATT GCCCCAGATC TCATTGGCAT GGGCAAAAGC GACAAACCGG ATTTGGGCTA CTTCTTCGAC
1201 GATCACGTAC GGTTTATGGA CGCCTTTATC GAGGCTCTGG GACTGGAGGA AGTAGTGCTG GTTATTTCATG ACTGGGGCTC
   C-->G (silent)
1281 TGCATTAGGC TTTCCTGGG CTAAACGGAA CCCAGAACGC GTCAAGGGGA TTGCCTTCAT GGAGTTCATC CGTCCGATTC
1361 CGACCTGGGA TGAATGGCCC GAATTTGCCG GTGAAACCTT TCAGGCGTTT CGTACCACGG ATGTTGGCCG TAAGTCATC
1441 ATCGACCAAA ACGTGTTCAT TGAGGGCACT CTCCCATGG GAGTAGTGCG TCCTTTAACC GAAGTCGAGA TGGACCACTA
1521 TCGCGAACC TTCTGAATC CGGTTGATCG CGAACCGCTG TGGCGCTTCC CGAATGAGCT GCCTATTGCT GGTGAACCGG
1601 CGAATATCGT GGCACTTGTG GAAGAATACA TGGATTGGCT GCATCAGAGT CCAGTCCCTA AGCTGTGTGT TTGGGGTACA
1681 CCTGGCGTGT TGATTCCGCC TGCAGAAGCT GCTCGCTTAG CGAAAAGCTT GCCCAACTGC AAAGCGGTGC ATATTGGGCC
1761 AGGTCTGAAC CTGTTACAGG AGGATAACCC GGATCTGATC GGGAGTGAAA TCGCGCGTTG GCTGTCAACT CTGGAATCT
1841 CGGGTCTTGC ATCTGACTC GAGCACCACC ACCACCACCA CTGAGATCCG GCTGCTAACA AAGCCCGAAA GGAAGCTGAG
   His-Tag
1921 TTGGCTGCTG CCACCGCTGA GCAATAACTA GCATAACCCC TTGGGGCCTC TAAACGGGTC TTGAGGGGTT TTTTG
   T7-Terminator

```

*DeoC-EC-DM-CHalo AA-sequence**"CHalo"*

```

1 MASTDLKASS LRALKLMDLT TLNDDTDEK VIALCHQAKT PVGNATAIMI YPRFIPIARK TLKEQGTPEI RIATVTNFPH
81 GNDDIDIALA ETAAICYG ADEVVVFYR ALMAGNEQVG FDLVKACKEA CAAANVLLKV ILETGELKDE ALIRKASEIS
161 IKAGADFIKT STGKVAVNAT PESARIMMEV IRDMGVEKTV GFKPAGGVRT AEDAQKYLAI ADELFGADWA DARHYRFGAS
241 SLLASLLKAL GHGDGKSASS YGSEAAAKEA AAKEAAAKEA AAKAEIGTF PFDPHYVEVL GERMHYVDVG PRDGPVLF
321 HGNPTSSYVW RNIIPHVAPT HRCIAPDLIG MGKSDKPDIG YFFDDHVRFM DAFIEALGLE EVVLVIHDWG SALGFHWAKR
401 NPERVKGIAF MEFIRPIPTW DEWPEFARET FQAFRTTDVG RKLIIDQNVF IEGTLPNGVV RPLTEVEMDH YREPFLNPVD
481 REPLWRFPNE LPIAGEPANI VALVEEYMDW LHQSPVPKLL FWGTPGVLP PAEAARLAKS LPNCKAVDIG PGLNLLQEDN
561 PDLIGSEIAR WLSTLEISGL AS

```

## Supplementary References

- Schägger, H.; von Jagow, G. Tricine-sodium dodecyl sulfate-polyacrylamide gel electrophoresis for the separation of proteins in the range from 1 to 100 kDa. *Anal. Biochem.* **1987**, *166*, 368-379, doi:[https://doi.org/10.1016/0003-2697\(87\)90587-2](https://doi.org/10.1016/0003-2697(87)90587-2).
- Kang, D.; Gho, Y.S.; Suh, M.-K.; Kang, C. Highly Sensitive and Fast Protein Detection with Coomassie Brilliant Blue in Sodium Dodecyl Sulfate-Polyacrylamide Gel Electrophoresis. *Bull. Korean Chem. Soc.* **2002**, *23*, 1511-1512, doi:10.5012/BKCS.2002.23.11.1511.
- Details of R square. Available online: [https://www.originlab.com/doc/en/Origin-Help/Details\\_of\\_R\\_square](https://www.originlab.com/doc/en/Origin-Help/Details_of_R_square) (accessed on 14.07.2022).
- Entry P0A6L0 · DEOC\_ECOLI. Available online: <https://www.uniprot.org/uniprotkb/P0A6L0> (accessed on 20.07.2022).
